# Supplementary material
Source: PubMed Central journal article supplement (PMC7730781)

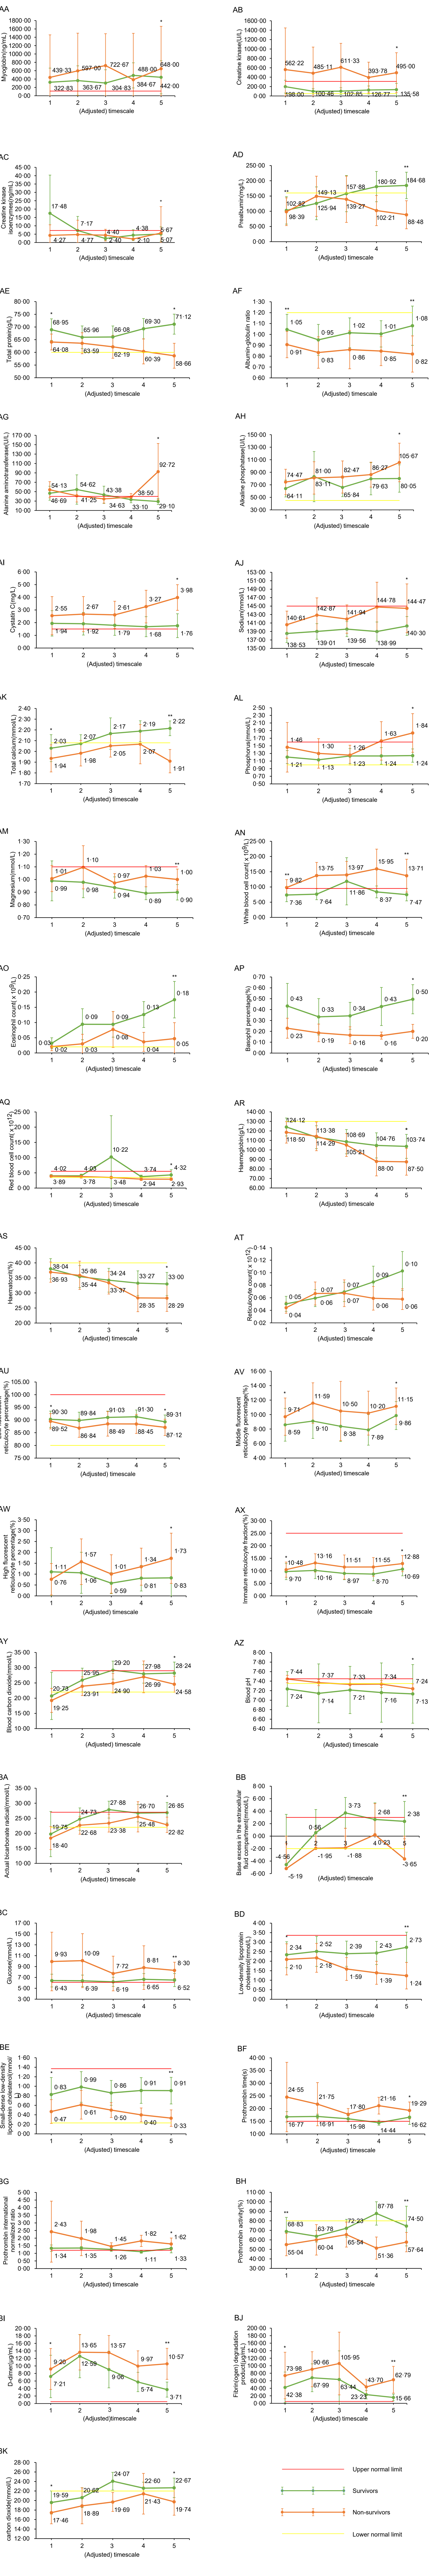

Supplement: 12879_2020_5678_MOESM3_ESM.pdf [file 12879_2020_5678_MOESM3_ESM.pdf]
